# Supplementary material
Source: publisher site journal article supplement (https://www.dovepress.com/article/286981)
Supplement: Supplementary file 1 [file get_supplementary_file.php]

# Appendix-1

**Section I: Consent form**

I want to thank you for taking the time to meet with me today. My name is ____________________________ and I would like to talk to you about your experiences of logistics management information system. Specifically, as one of the components of our overall program evaluation, we are assessing program performance to capture lessons that can be used in future interventions. The interview should between 20-25 minutes. Please be sure to speak up so that we do not miss your comments. All responses will be kept confidential. This means that your interview responses will only be shared with research team members and we will ensure that any information we include in our report does not identify you as the respondent. Remember, you do not have to talk about anything you do not want to and you may end the interview at any time. Are there any questions about what I have just explained? Are you willing to participate in this interview? Can I continue? Yes ___/ No ___; If no, Stop!

Thank you very much!

Interviewee_____________________Witness___________________ Date__________________Place____________________age_________sex_______current position_____________

Years of experience (total___________ / current position_________________________)

remarks____________________________________________________________________________________________________________________________________________________________________________________________________________________________

**Section II: interview questions and probes**

1. Is there a logistics management information system in your health facility? Yes____/No____if yes, goes to Q2.
2. Do you think logistics management information systems are important? Yes__ /No__, if yes, would you give me an example?
3. Could you tell me about the electronic logistic management information system? Please explain.
4. Does the information system on LMIS include necessary logistics data? Are logistics data used at each level of the system as appropriate? Can you elaborate on that idea?
5. What are the issues to keep data quality of bin card records and RRF reports? Could you tell me more?
6. What are the common issues with the logistics management information system? Can you elaborate on that idea?
7. Please describe health facility issues of providing pharmaceutical logistics services? Would you tell me more challenges?
8. Do LMIS or other information system reports received at the central level provide information on stock status at the health facility level? Would you explain how?
9. What type of supports you had from higher-level health care facilities? Can you elaborate on that idea?
10. Is there a feedback mechanism placed to channel logistics information back to lower levels? Can you elaborate on that idea?

- Is there anything more you would like to add?

Thank you for your time!
