# Supplementary material
Source: publisher site journal article supplement (https://www.dovepress.com/article/286981)
Supplement: Supplementary file 2 [file get_supplementary_file.php]

## Supplementary File

Table 1 Updated and accurate data of bin cards by product and facility type in East Gojjam Zone, March 2018 (hospitals n=5, health centers n =15)

| Product                        | Bin card updated |                       | Accurate          |                         |                  | Near accurate (+/-10%)* |                        |                  |
|--------------------------------|------------------|-----------------------|-------------------|-------------------------|------------------|-------------------------|------------------------|------------------|
|                                | Hospital<br>n(%) | Health center<br>n(%) | Hospital<br>n (%) | Health centers<br>n (%) | Total<br>n(%)    | Hospital<br>n (%)       | Health center<br>n (%) | Total<br>n(%)    |
| <b>ARV</b>                     |                  |                       |                   |                         |                  |                         |                        |                  |
| EFV 200mg                      | 5(100)           | 11 (73.3)             | 3(60)             | 11(73.3)                | 9(45)            | 4(80)                   | 14(93.3)               | 18(90)           |
| EFV 50mg                       | 3(60)            | 13 (87.7)             | 4(80)             | 9(60)                   | 13(65)           | 4(80)                   | 11(73.3)               | 15(75)           |
| EFV 600mg                      | 5(100)           | 13 (87.7)             | 3(60)             | 11(73.3)                | 9(45)            | 3(60)                   | 14(93.3)               | 17(85)           |
| 3TC 150mg                      | 4(80)            | 10(66.7)              | 3(60)             | 8(53.3)                 | 10(50)           | 4(80)                   | 9(60)                  | 13(65)           |
| 3TC+ TDF                       | 5(100)           | 15 (100)              | 4(80)             | 11(73.3)                | 15(75)           | 4(80)                   | 15(100)                | 19(95)           |
| (300/300)                      |                  |                       |                   |                         |                  |                         |                        |                  |
| 3TC+NVP+AZT(c<br>hild dose)    | 5(100)           | 12 (80)               | 3(60)             | 10(66.7)                | 10(50)           | 3(60)                   | 12(80)                 | 15(75)           |
| 3TC +NVP<br>+AZT(adultdose)    | 4(80)            | 11(73.3)              | 4(80)             | 8(53.3)                 | 11(55)           | 4(80)                   | 13(86.7)               | 17(85)           |
| 3TC +AZT (child )              | 3(60)            | 8(53.30)              | 3(60)             | 9(60)                   | 12(60)           | 3(60)                   | 12(80)                 | 15(75)           |
| 3TC + EFV+TDF<br>(300/600/300) | 5(100)           | 15 (100)              | 4(80)             | 10(66.7)                | 14(70)           | 4(80)                   | 11(73.3)               | 15(75)           |
| 3TC+ AZT(adult)                | 5(100)           | 10(66.7)              | 3(60)             | 9(60)                   | 12(60)           | 3(60)                   | 9(60)                  | 12(60)           |
| NVP Suspension                 | 4(80)            | 10(66.7)              | 2(40)             | 6(40)                   | 9(45)            | 2(40)                   | 13(86.7)               | 15(75)           |
| NVP 200mg                      | 2(40)            | 8(53.3)               | 3(60)             | 8(53.3)                 | 9(45)            | 4(80)                   | 11(73.3)               | 15(75)           |
| <b>Subtotal</b>                | <b>50(83.3)</b>  | <b>136(76)</b>        | <b>39(65)</b>     | <b>110(61.1)</b>        | <b>149(62.1)</b> | <b>42(70)</b>           | <b>144(80)</b>         | <b>186(77.5)</b> |
| <b>FP/MCH</b>                  |                  |                       |                   |                         |                  |                         |                        |                  |
| Implanon                       | 3(60)            | 12(80)                | 4(80)             | 10(66.7)                | 14(70)           | 4(80)                   | 11(73.3)               | 15(75)           |
| Jadelle                        | 4(80)            | 14(93.3)              | 3(60)             | 11(73.3)                | 14(70)           | 4(80)                   | 15(100)                | 19(95)           |
| Emergency Pills/2              | 5(100)           | 14(93.3)              | 5(100)            | 12(80)                  | 17(85)           | 5(100)                  | 12(80)                 | 17(85)           |
| Microgynon                     | 5(100)           | 10(66.7)              | 4(80)             | 10(66.7)                | 14(70)           | 4(80)                   | 12(80)                 | 16(80)           |
| Depo Provera                   | 5(100)           | 15(100)               | 3(60)             | 13(86.6)                | 16(80)           | 3(60)                   | 14(93.3)               | 17(85)           |
| CUT380A                        | 4(80)            | 12(80)                | 4(80)             | 11(73.3)                | 15(75)           | 4(80)                   | 11(73.3)               | 15(75)           |
| Oxytocin Injection             | 3(60)            | 8(53.3)               | 2(40)             | 8(53.3)                 | 10(50)           | 3(60)                   | 12(80)                 | 15(75)           |

|                     |                  |                   |                  |                 |                  |                  |                  |                  |
|---------------------|------------------|-------------------|------------------|-----------------|------------------|------------------|------------------|------------------|
| Mini Pills          | 4(80)            | 10(66.7)          | 3(60)            | 12(80)          | 15(75)           | 4(80)            | 14(93.3)         | 18(90)           |
| <b>Sub-total</b>    | <b>33(82.5)</b>  | <b>95(79.2)</b>   | <b>28(70)</b>    | <b>87(72.5)</b> | <b>115(71.9)</b> | <b>31(77.5)</b>  | <b>101(84.2)</b> | <b>132(82.5)</b> |
| <b>Anti-TB</b>      |                  |                   |                  |                 |                  |                  |                  |                  |
| INH 300mg           | 4(80)            | 12(80)            | 2(40)            | 9 (60)          | 11(55)           | 4(80)            | 13(86.7)         | 17(85)           |
| (RHZE+RH) kit       | 5(100)           | 14(93.3)          | 5(100)           | 10(66.7)        | 15(75)           | 5(100)           | 10(66.7)         | 15(75)           |
| Ethambutol 400mg    | 3(60)            | 11(73.3)          | 3(60)            | 8 (53.3)        | 11(55)           | 3(60)            | 11(73.3)         | 14(70)           |
| RHZ (60/ 30/150)    | 4(80)            | 12(80)            | 3(60)            | 5(33.3)         | 8(40)            | 4(80)            | 8(53.3)          | 12(60)           |
| RH (60/30)          | 5(100)           | 11(73.3)          | 4(80)            | 9(60)           | 13(65)           | 4(80)            | 12(80)           | 16(80)           |
| Ethambutol 100mg    | 3(60)            | 7(46.7)           | 2(40)            | 3(20)           | 5(25)            | 2(40)            | 9(60)            | 11(55)           |
| INH 100 mg          | 3(60)            | 11(73.3)          | 3(60)            | 10(66.7)        | 13(65)           | 3(60)            | 12(80)           | 15(75)           |
| RH (150/75)         | 4(80)            | 10(66.7)          | 4(80)            | 9(60)           | 13(65)           | 4(80)            | 9(60)            | 13(65)           |
| RHZ (75/50/150)     | 5(100)           | 12(80)            | 4(80)            | 7(46.7)         | 11(55)           | 4(80)            | 10(66.7)         | 14(70)           |
| <b>Sub total</b>    | <b>36(80)</b>    | <b>100(74.1)</b>  | <b>30(66.7)</b>  | <b>70(51.8)</b> | <b>100(55.6)</b> | <b>33(73.3)</b>  | <b>94(69.6)</b>  | <b>127(71)</b>   |
| <b>Anti-Malaria</b> |                  |                   |                  |                 |                  |                  |                  |                  |
| Coartem (4x6)       | 5(100)           | 13(86.7)          | 3(60)            | 12(80)          | 16(80)           | 4(80)            | 14(93.3)         | 18(90)           |
| Chloroquine syrup   | 3(60)            | 10(66.7)          | 2(40)            | 11(33.3)        | 7(35)            | 2(40)            | 12(80)           | 14(70)           |
| Quinine 300mg       | 2(40)            | 12(80)            | 3(60)            | 13 (53.3)       | 11(55)           | 4(80)            | 13(86.7)         | 17(85)           |
| <b>Sub-total</b>    | <b>10(66.7)</b>  | <b>35(77.7)</b>   | <b>8(53.3)</b>   | <b>36(80)</b>   | <b>44(73.3)</b>  | <b>10(66.7)</b>  | <b>39(86.7)</b>  | <b>49(81.7)</b>  |
| <b>Total</b>        | <b>129(80.6)</b> | <b>366(76.25)</b> | <b>105(65.6)</b> | <b>303(63)</b>  | <b>408(63.8)</b> | <b>116(72.5)</b> | <b>378(78.8)</b> | <b>494(77.2)</b> |

\* Near accuracy includes exact accuracy and those within less than a 10 percent discrepancy

Table 2: Data accuracy of RRF reports by product and facility type in East Gojjam Zone, March 2018 ((hospitals n=5, (RRF=13), health centers n=15, (RRF=42)).

| Product                        | Accurate RRF      |                        |                  | Near accurate RRF (+/-10%)* |                        |                  |
|--------------------------------|-------------------|------------------------|------------------|-----------------------------|------------------------|------------------|
|                                | Hospital<br>n (%) | Health center<br>n (%) | Total<br>n (%)   | Hospital<br>n (%)           | Health center<br>n (%) | Total<br>n (%)   |
| <b>ARV</b>                     |                   |                        |                  |                             |                        |                  |
| EFV 200mg                      | 7(53.8)           | 22(52.3)               | 29(52.7)         | 12(92.3)                    | 30(71.4)               | 42(76.4)         |
| EFV 50mg                       | 9 (69.2)          | 24(51.1)               | 33(60)           | 10(76.9)                    | 27(64.3)               | 37(67.3)         |
| EFV 600mg                      | 10(76.9)          | 31(73.8)               | 41(74.5)         | 10(76.9)                    | 34(81)                 | 44(80)           |
| 3TC 150mg                      | 8 (61.5)          | 23(54.8)               | 31(56.4)         | 9 (69.2)                    | 32(76.2)               | 41(74.5)         |
| 3TC+ TDF (300/300)             | 10(76.9)          | 32(76.2)               | 42(76.4)         | 11(84.6)                    | 33(78.6)               | 44(80)           |
| 3TC+NVP+AZT<br>(child dose)    | 7(53.8)           | 30(71.4)               | 37(67.3)         | 9 (69.2)                    | 36(85.7)               | 45(81.8)         |
| 3TC +NVP +AZT<br>(adult dose)  | 8(61.5)           | 21(50)                 | 29(52.7)         | 10(76.9)                    | 30(71.4)               | 40(72.7)         |
| 3TC +AZT (child )              | 9 (69.2)          | 19(45.2)               | 28(50.9)         | 9 (69.2)                    | 29(69)                 | 38(69.1)         |
| 3TC + EFV+TDF<br>(300/600/300) | 11(84.6)          | 25(59.5)               | 36(65.5)         | 12(92.3)                    | 28(66.7)               | 40(72.7)         |
| 3TC+ AZT (adult)               | 9 (69.2)          | 16(38.1)               | 25(45.5)         | 10(76.9)                    | 25(59.5)               | 35(63.6)         |
| NVP Suspension                 | 10(76.9)          | 22(52.4)               | 32(58.2)         | 12(92.3)                    | 26(61.9)               | 38(69.1)         |
| NVP 200mg                      | 8(61.5)           | 13(31)                 | 21(38.2)         | 10(76.9)                    | 23(54.8)               | 33(60)           |
| <b>Sub-total</b>               | <b>106(67.9)</b>  | <b>278(55.2)</b>       | <b>384(58.2)</b> | <b>124(79.5)</b>            | <b>353(70)</b>         | <b>477(72.3)</b> |
| <b>FP/MCH</b>                  |                   |                        |                  |                             |                        |                  |
| Implanon                       | 10(76.9)          | 27(64.3)               | 37(67.3)         | 10(76.9)                    | 27(64.3)               | 37(67.3)         |
| Jadelle                        | 9 (69.2)          | 22(52.4)               | 31(56.4)         | 9 (69.2)                    | 30(71.4)               | 39(70.9)         |
| Emergency Pills/2              | 10(76.9)          | 22(52.4)               | 32(58.2)         | 12(92.3)                    | 27(64.3)               | 39(70.9)         |
| Microgynon                     | 10(76.9)          | 25(59.5)               | 35(63.6)         | 11(84.6)                    | 29(69)                 | 40(72.7)         |
| Depo Provera                   | 12(92.3)          | 33(78.5)               | 45(81.8)         | 12(92.3)                    | 34(81)                 | 46(83.6)         |
| CUT380A                        | 8(61.5)           | 31(73.8)               | 39(70.9)         | 11(84.6)                    | 31(73.8)               | 42(76.4)         |
| Oxytocin Injection             | 9 (69.2)          | 21(50)                 | 30(54.5)         | 10(76.9)                    | 24(57.1)               | 34(61.8)         |
| Mini Pills                     | 10(76.9)          | 23(54.8)               | 33(60)           | 10(76.9)                    | 28(66.7)               | 38(69.1)         |
| <b>Sub-total</b>               | <b>78(75)</b>     | <b>204(60.7)</b>       | <b>282(64.1)</b> | <b>85(81.7)</b>             | <b>230(68.5)</b>       | <b>315(71.6)</b> |
| <b>Anti-TB</b>                 |                   |                        |                  |                             |                        |                  |
| INH 300mg                      | 11(84.6)          | 26(61.9)               | 37(67.3)         | 12(92.3)                    | 29(69)                 | 41(74.5)         |
| (RHZE+RH) kit                  | 13(100)           | 35(83.3)               | 48(87.3)         | 13(100)                     | 36(85.7)               | 49(89.1)         |
| Ethambutol 400mg               | 8(61.5)           | 23(54.8)               | 31(56.4)         | 10(76.9)                    | 26(61.9)               | 36(65.5)         |
| RHZ (60/ 30 /150)              | 9 (69.2)          | 27(64.3)               | 36(65.5)         | 9 (69.2)                    | 27(64.3)               | 36(65.5)         |
| RH (60/30)                     | 9 (69.2)          | 31(73.8)               | 40(72.7)         | 11(84.6)                    | 36(85.7)               | 47(85.5)         |
| Ethambutol 100mg               | 10(76.9)          | 22(52.4)               | 32(58.2)         | 12(92.3)                    | 29(69)                 | 41(74.5)         |
| INH 100 mg                     | 8(61.5)           | 22(52.4)               | 30(54.5)         | 10(76.9)                    | 28(66.7)               | 38(69.1)         |
| RH (150/75)                    | 6(46.2)           | 30(71.4)               | 36(65.5)         | 8(61.5)                     | 32(76.2)               | 40(72.7)         |
| RHZ (75/50/150)                | 8(61.5)           | 33(78.6)               | 41(74.5)         | 9(69.2)                     | 37(88.1)               | 46(83.6)         |
| <b>Sub total</b>               | <b>82(70.1)</b>   | <b>249(65.9)</b>       | <b>331(66.9)</b> | <b>94(80.3)</b>             | <b>280(74.1)</b>       | <b>374(75.6)</b> |
| <b>Anti-Malaria</b>            |                   |                        |                  |                             |                        |                  |

|                   |                  |                  |                   |                  |                  |                   |
|-------------------|------------------|------------------|-------------------|------------------|------------------|-------------------|
| Coartem (4x6)     | 11(84.6)         | 31(73.8)         | 42(76.4)          | 12(92.3)         | 35(83.3)         | 47(85.5)          |
| Chloroquine syrup | 7 (53.8)         | 14(33.3)         | 21(38.2)          | 7 (53.8)         | 25(59.5)         | 32(58.2)          |
| Quinine 300mg     | 9 (69.2)         | 20(47.6)         | 29(52.7)          | 10(76.9)         | 28(66.7)         | 38(69.1)          |
| <b>Sub-total</b>  | <b>27(69.2)</b>  | <b>65(51.6)</b>  | <b>92(55.8)</b>   | <b>29(74.4)</b>  | <b>88(69.8)</b>  | <b>117(70.9)</b>  |
| <b>Total</b>      | <b>293(70.4)</b> | <b>796(59.2)</b> | <b>1089(61.9)</b> | <b>332(79.8)</b> | <b>951(70.8)</b> | <b>1283(72.9)</b> |

*\*Near accuracy includes exact accuracy and those within less than a 10 percent discrepancy*
